# Supplementary material for: Why do colder mothers produce larger eggs? An optimality approach
Source: Oxford University Press journal article supplement (doi:10.1242/jeb.043356), 2010-10-29
Supplement: jeb043356tables1.pdf [file jeb043356tables1.pdf]

Table S1. Appendix of estimates of effects of offspring size on various performance parameters across different temperatures for *Danio rerio*

| Measure          | Slope    | s.e.  | Intercept |
|------------------|----------|-------|-----------|
| Fertilisation    |          |       |           |
| 20°C             | 0        | n.a.  | 8.12      |
| 25°C             | 0        | n.a.  | 5.48      |
| 30°C             | -74.5437 | 35.94 | 26.27     |
| Hatchling length |          |       |           |
| 20°C             | 2.85     | 0.40  | 0.41      |
| 25°C             | 1.38     | 0.51  | 0.87      |
| 30°C             | 1.32     | 0.39  | 0.80      |
| Velocity         |          |       |           |
| 20°C             | 275      | 228   | 50        |
| 25°C             | -503     | 203   | 49.72     |
| 30°C             | 935      | 389   | -119.06   |
